# Supplementary material for: SQUAMOSA PROMOTER BINDING PROTEIN-LIKE 9 and 13 repress BLADE-ON-PETIOLE 1 and 2 directly to promote adult leaf morphology in Arabidopsis
Source: PubMed Central journal article supplement (PMC10049914; doi:10.1093/jxb/erad017), 2023-01-11
Supplement: erad017_suppl_supplementary_material.pdf [file erad017_suppl_supplementary_material.pdf]

# Figure S1

A

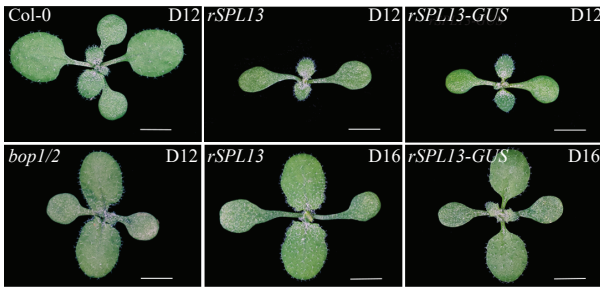

B

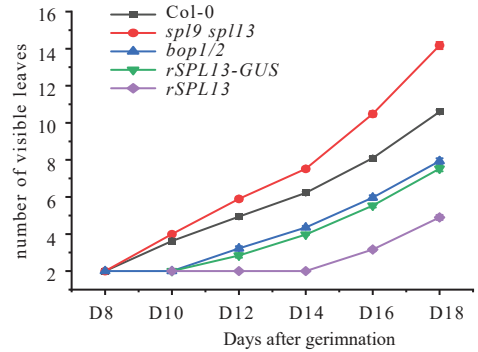

C

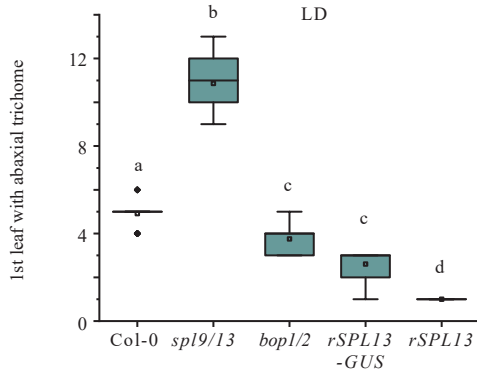

D

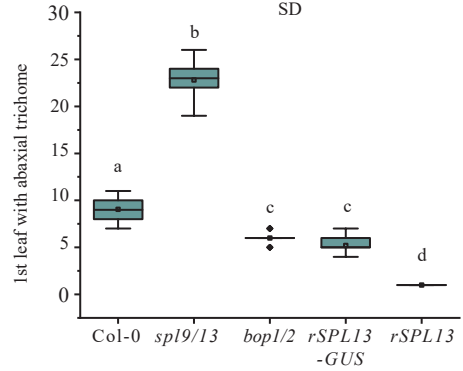

E

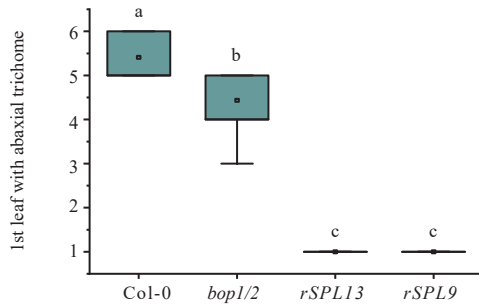

**Fig. S1.** Plants ectopically expressing SPL13 mimic *bop1 bop2* double mutant. (A) Rosettes of Col-0, *bop1/2* and *rSPL13* plants in LD conditions. Bars=3mm. (B) Leaf initiation is accelerated in *spl9/13* double mutant and delayed in *bop1/2* and *rSPL13* plant. (C-D) Vegetative phase change in Col-0, *spl9/13*, *bop1/2*, *rSPL13-GUS* plant and *rSPL13* plant in LDs (C) and SDs (D). (E) Vegetative phase change in Col-0, *bop1/2*, *rSPL9* and *rSPL13* plants in LDs. Different letters indicate significantly different groups,  $P < 0.001$ , one-way ANOVA.

## Figure S2

**A**

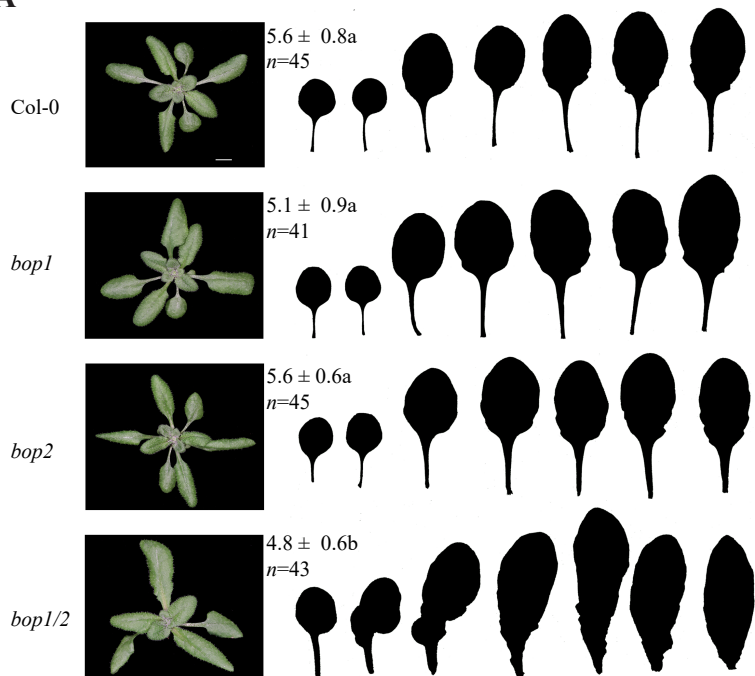

**B**

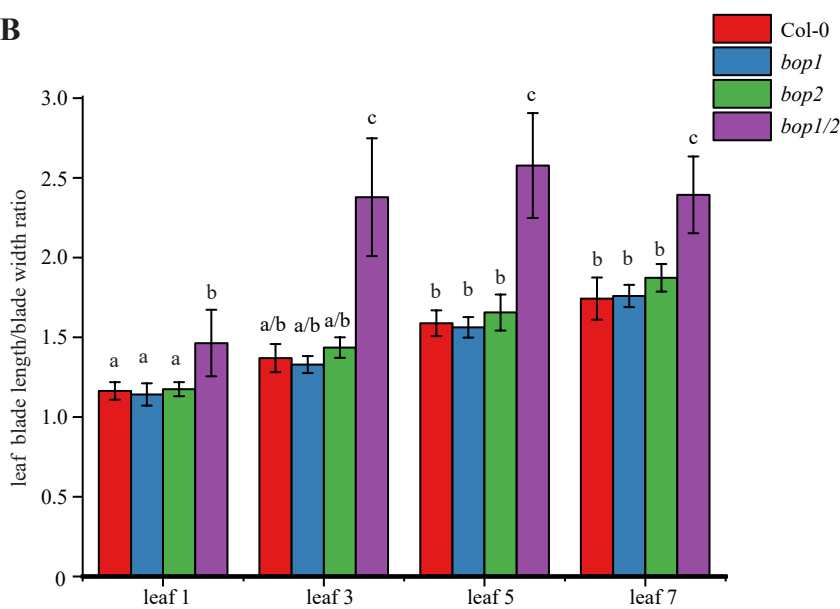

**C**

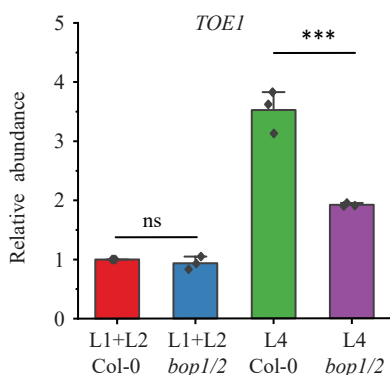

**D**

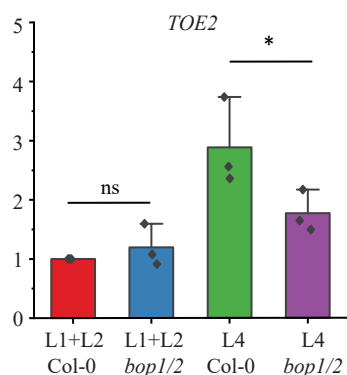

**Fig. S2.** BOP1 and BOP2 act redundantly to promote petiole development and suppress blade outgrowth. (A) Rosettes and heteroblasty of Col-0, *bop1* single mutant, *bop2* single mutant and *bop1/2* double mutant. Numbers indicate the first leaf with abaxial trichome in each genotype. Shared letters denote not significantly different groups,  $p > 0.05$ , one-way ANOVA. (B) Leaf blade length:width ratio in leaf 1, leaf 3, leaf 5, and leaf 7 of Col-0, *bop1*, *bop2* and *bop1/2*. The blade length:width ratio in each leaf of *bop1/2* double mutant is significantly higher than the corresponding leaves in Col-0, *bop1* or *bop2*, while the ratio in *bop1* or *bop2* single mutants are not higher than Col-0 in each leaf. Shared letters above bars denote not significantly different groups, different letters above bars denote significantly different groups,  $p < 0.05$ , two-way ANOVA. (C-D) Transcripts of *TOE1* (C) and *TOE2* (D) in leaf 1 and 2 (L1+L2) and leaf 4 (L4) of Col-0 and *bop1/2* double mutant. The levels of *TOE1* or *TOE2* in Col-0 L1+L2 were set to be 1. Values are from three independent biological replicates (diamonds). \*\*\* $p < 0.001$ , \* $p < 0.05$ , ns, not significant, one-way ANOVA.

**Figure S3**

**A**

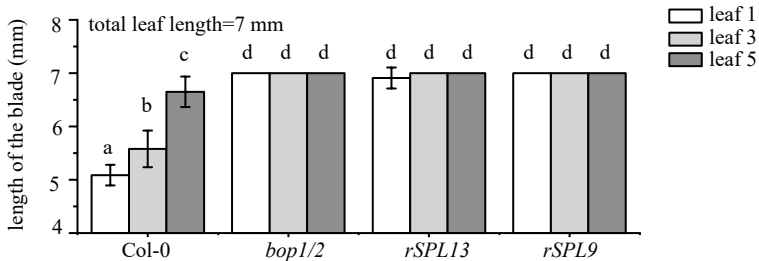

**B**

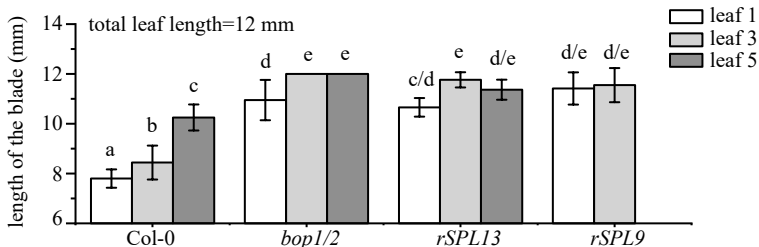

**C**

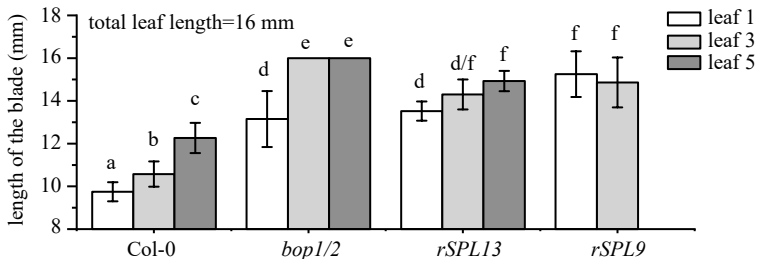

**Fig. S3.** BOP1/2 promote while SPL9 and SPL13 suppress petiole development. (A-C) Statistical analysis of the length of the blade when the leaf is 7 mm long (A), 12 mm long (B), and 16 mm long (C).

## Figure S4

### A

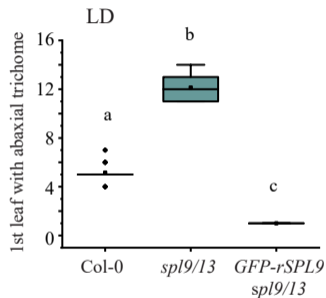

### B

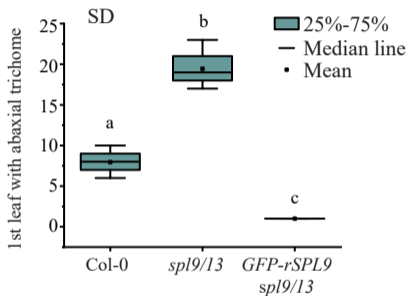

**Fig. S4.** Ectopic expression of *GFP-rSPL9 spl9/13* accelerated abaxial trichome production in both LDs (A) and SDs (B). Different letters above each boxes indicate significantly different groups,  $p < 0.001$ , one-way ANOVA.

# Figure S5

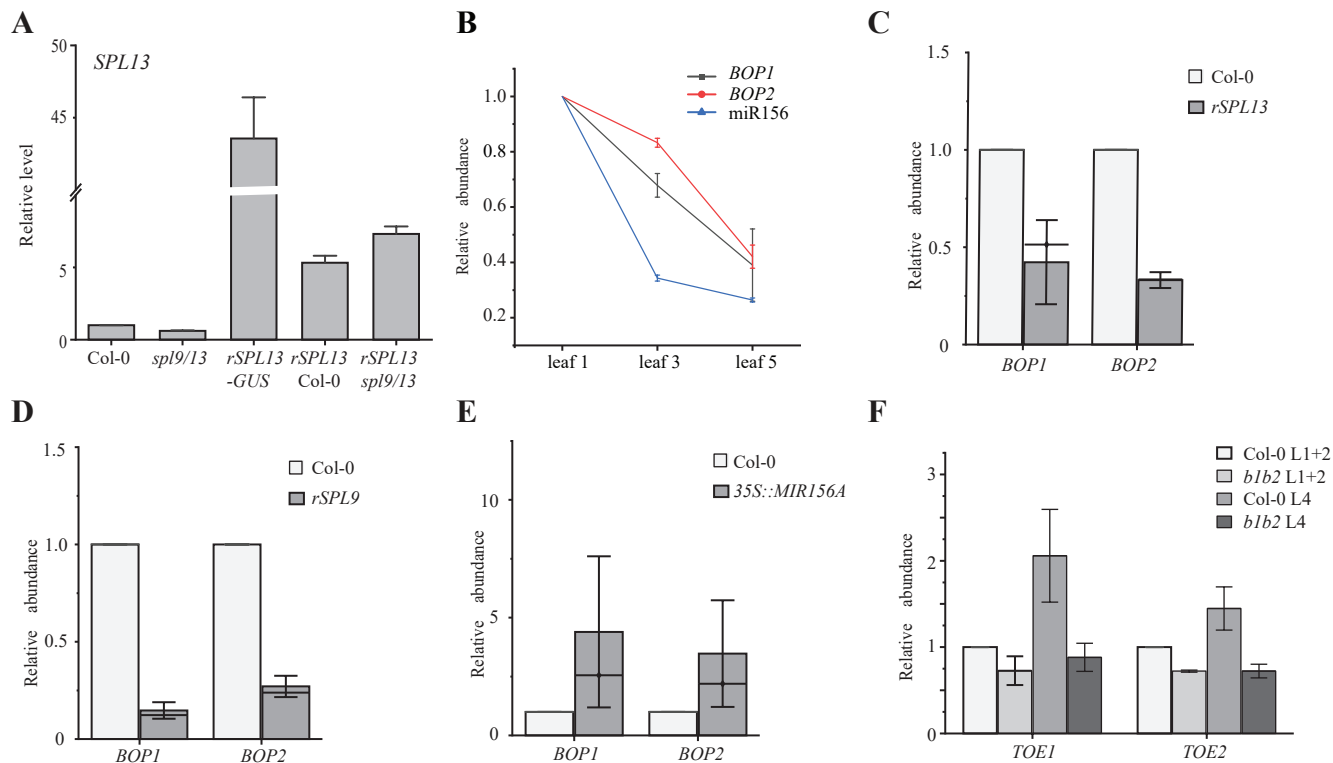

**Fig. S5.** RT-qPCR analysis of gene expression normalized to *EIF4A1*. (A) RT-qPCR analysis of *SPL13* in different plants. (B) RT-qPCR analysis of *BOP1*, *BOP2* and miR156 in leaf 1, leaf 3, and leaf 5. (C-E) RT-qPCR analysis of *BOP1* and *BOP2* in Col and *rSPL13* plant (C), *rSPL9* plant (D), and *35S::MIR156A* (E). (F) RT-qPCR analysis of *TOE1* and *TOE2* in Col-0 and *bop1/2* leaves.

Supplementary Table 1. Primers used in this study.

|                                 |                                          |
|---------------------------------|------------------------------------------|
| primers for RT-qPCR             | 5'-3'                                    |
| BOP1 qPCR F                     | GTATCAAAGAAATCAACAAAGGAG                 |
| BOP1 qPCR R                     | CGTTGATTAAGAGGTTTAGGTAAT                 |
| BOP2 qPCR F                     | GGAAGGTATGAGTCGGCATC                     |
| BOP2 qPCR R                     | TGCATGCCCTCTTCTTAAT                      |
| SPL13 qPCR F                    | GGGTTTTCAAGGTAGCAAATTGCT                 |
| SPL13 qPCR R                    | ACCAACAACATAGCTCTGGCTCTG                 |
| TOE1 qPCR F                     | ACCGGTAATGCGCCAAAGCAA                    |
| TOE1 qPCR R                     | ACCGGCTTTCCCATGTATTCGT                   |
| TOE2 qPCR F                     | TGCCCTTCCTTCTGCGTTCTTT                   |
| TOE2 qPCR R                     | ACTGATCATGCCCTTGCCATGT                   |
| ACT2 F                          | GCACCCTGTTCTTCTTACCG                     |
| ACT2 R                          | AACCCTCGTAGATTGGCACA                     |
| EIF4A1-F                        | ACAGTTTGATGCACGTCAGTTTG                  |
| EIF4A1-R                        | TCTCAAACCATAAGCATAAATACC                 |
|                                 |                                          |
| Primers for ChIP                | 5'-3'                                    |
| BOP1 ChIP F1                    | TTAAGTTAGTACAGTGGAGACTTT                 |
| BOP1 ChIP R1                    | CATATGCATGCGTATTAATTGCTA                 |
| BOP1 ChIP F2                    | CTATCATTTTACTGCACAATCTTTC                |
| BOP1 ChIP R2                    | ATGCTAATAAAATGAGGACTACTTC                |
| BOP1 ChIP F3                    | AATACTACAAACTCCAAATGCTAG                 |
| BOP1 ChIP R3                    | GAGAGAGACTATAGTGTTTAGAAGA                |
| BOP2 ChIP F1                    | ACAACATGCAAATCAGTAAGAAA                  |
| BOP2 ChIP R1                    | TCCTAGTAAGATTAGCCTAAAAT                  |
| BOP2 ChIP F2                    | TTCTCTCTCTCTTTTCTTTCTTT                  |
| BOP2 ChIP R2                    | TTTATTGATCTTGTTGGCTATGAAG                |
| BOP2 ChIP F3                    | AACCTACTAATCAACGGTCAAG                   |
| BOP2 ChIP R3                    | ATGTTGGGTGCGGTCTATAC                     |
| TA3 F                           | CTGCGTGGAAGTCTGTCAA                      |
| TA3 R                           | CTATGCCACAGGGCAGTTTT                     |
|                                 |                                          |
| Primers for making AN3 promoter | 5'-3'                                    |
| Bpil-AN3-Pro-F1                 | TTGAAGACAAGGAGAATTGTTTTGGATATCTCGAAGTTAT |
| Bpil-AN3-Pro-R1                 | TTGAAGACAATCTCTAAAGTTTTTGAATGCTTT<br>TGT |
| Bpil-AN3-Pro-F2                 | TTGAAGACAAGAGATCCTTTGGTTGAGAATCATCAATATT |

|                                     |                                                          |
|-------------------------------------|----------------------------------------------------------|
| Bpil-AN3-Pro-R2                     | TTGAAGACAATCCTCTTATGCGGATTAGATTTGGCAT                    |
| Bpil-AN3-Pro-F3                     | TTGAAGACAAAGGACTAAGTCACAACATAATTCAGTAATTT                |
| Bpil-AN3-Pro-R3                     | TTGAAGACAAAACCTTTACATATATACTACTACTTATCAATATGT            |
| Bpil-AN3-Pro-F4                     | TTGAAGACAAGGTTTCACGTCTCTATAATAAAGTATGACT                 |
| Bpil-AN3-Pro-R4                     | TTGAAGACAACATTCCAGCCATCATGGGCTGCATCT                     |
| primers for making SPL13 constructs | 5'-3'                                                    |
| SPL13 pro F1                        | TTGGTCTCAACATGGAGTTTTTTGTTAACCGGAAAATTGCTTTC             |
| SPL13 pro R1                        | TTGGTCTCAGTCCTCCATGTCTTTAAAAGTTTTGCAG                    |
| SPL13 pro F2                        | TTGGTCTCAGGACTTTTATACGATTCTCCCTGATAA                     |
| SPL13 pro R2                        | TTGGTCTCAACAACATTCAAAGATTGTGCTTTTTTTTCTTCTCTC            |
| SPL13 CD F1                         | TTGAAGACAAAATGGACTGGAATTTCAAACCTTAGCTCTGGTT              |
| SPL13 CD R1                         | TTGGTCTCATCGCCTTCGATTATGTCCATCAAGACG                     |
| SPL13 CD F2                         | TTGGTCTCAGCGACGGAAGCCGCAGCCTGAACATAT                     |
| SPL13 CD R2                         | TTGGTCTCAACAACGAACCTCCCAATGAAACGGGAATGTCTGCGGGAGACGG     |
| SPL13 CD R4                         | TTGAAGACAAAAGCCTACTCCCAATGAAACGGGAATGTCTGCGGGAGACGG      |
| SPL13 3UF1                          | TTGGTCTCAACATGCTTTAGAAGAAGAAGTAGGTAGATAGATAGAAT          |
| SPL13 3UR1                          | TTGGTCTCAAAGGCTGTACAAGATTATGAGAAGAATTGGA                 |
| SPL13 3UF2                          | TTGGTCTCACCTTCTTCTTCTCTCCAATCAAACCTCAAAC                 |
| SPL13 3UR2                          | TTGGTCTCAACAAAGCGGCTCAGAGAAGAGATAGTGATGTTAATTCT          |
|                                     |                                                          |
| primers for making SPL9 constructs  | 5'-3'                                                    |
| SPL9 proF1                          | TTGGTCTCAACATGGAGGGTTTTATCACATTTGAGCGTCCAAAGATATGGTCCCTG |
| SPL9 proR1                          | TTGGTCTCACTGGGACCAGGGAGCAATATTCAGACTCCCC                 |
| SPL9 proF2                          | TTGGTCTCACCAGATAGATGCTTTCAAATTTAATACTAC                  |
| SPL9 proR2                          | TTGGTCTCATCTGCGTGAGTAGAGGATAACAACAAATGTATGGTCCCT         |
| SPL9 proF3                          | TTGGTCTCACAGACAACCAGTCTAACGTTATTGCATAAG                  |
| SPL9 proR3                          | TTGGTCTCAACAACATTGTTGGTTTCTCTTACTCAGACAGAAAGGG           |
| SPL9 CDF1                           | TTGGTCTCAACATAATGGAGATGGGTTCCAACCTCGGGTCCGGGTCAT         |
| SPL9 CDR1                           | TTGGTCTCAAGAGGACCCGGATCCACCACCACCGTCCTCG                 |
| SPL9 CDF2                           | TTGGTCTCACTCTTCTCAGGTGGTCGTTCAAACAGACG                   |
| SPL9 CDR2                           | TTGGTCTCAACAAAAGCTCAGAGGGACCAGTTGGTATGGTGAGAAGAAG        |
| SPL9 3U F1                          | TTGGTCTCAACATGCTTCTTGTCTTTGCATCAGAGAATCTTCTTAC           |
| SPL9 3U R1                          | TTGGTCTCAGTCCTCTGATGAGTATATATGGTTCAAGTTT                 |
| SPL9 3U F2                          | TTGGTCTCAGGACAACCTTAACATGGCAGCTTTTCAAAT                  |
| SPL9 3U R2                          | TTGGTCTCAGTCCCTATCATCGTCTTACTTTTACTGTTTC                 |
| SPL9 3U F3                          | TTGGTCTCAGGACCTTTCTTCTAAAGATCTCTCATCATC                  |

|                        |                                                  |
|------------------------|--------------------------------------------------|
| SPL9 3U R3             | TTGGTCTCAACAAAGCGTTCTTCAGGAGACGAGTCAGTAGAGCCAGAG |
| Primers for genotyping | 5'-3'                                            |
| spl2-1 LP              | CTTTAAACCGAGAACCGGATC (T-DNA: LBb1)              |
| spl2-1 RP              | TGAATAGTGGAAAGAGAGAAAAGCTTC                      |
| spl9-4 LP              | TGGTTCCTCCACTGAGTCATC (T-DNA: LB3)               |
| spl9-4 RP              | GCTCATTATGACCAGCGAGTC                            |
| spl10 LP               | AGGACAAACGATGCAATCTTG (deletion)                 |
| spl10 RP               | TTTTCTTCCGAGCAACAACAG                            |
| spl 11 LP              | GGACGAGGTTTTTATCATAGGTTTGG (T-DNA: Flag LB4)     |
| spl11-1 RP             | GTTGCATTCTCTTTAGATTTTACTGTA                      |
| spl13 LP               | GCTCGAGTTCAAAGAGAACAAG                           |
| spl13 RP               | CAATCTTACCTGCTGCATTGTC (dCAPS digest with Sal I) |
| spl15 LP               | TGTTGGTGTCTGAAGTTGCTG (T-DNA: LBb1)              |
| Spl15 RP               | TCCACCGAGTCTTCTTCACTC                            |
| bop1-3 LP              | GCACAATCTTTGACTTCATCACC (T-DNA: LBb1)            |
| bop1-3 RP              | CGTACCCTTTGATTTTAGTATGCTG                        |
| bop2-1 LP              | AAAGAGAGAACCTGGGTGAGC (T-DNA: LBb1)              |
| bop2-1 RP              | ATTTGGCCACCTTTGTATTC                             |
| LBb1                   | ATTTTGCCGATTTTCGGAAC                             |
| LB3                    | TAGCATCTGAATTTTCATAACCAATCTCGATACAC              |
| Flag LB4               | TGTGCCAGGTGCCACGGAATAGT                          |
